# Supplementary material
Source: publisher figshare collection journal article supplement (https://gsajournals.figshare.com/ndownloader/files/15456005)
Supplement: Supplementary file 1 [file 15456005]

## Sheet: SuppTable.BMI.PheWAS.Results_ap
phenotype	description	beta	SE	p	n_total
278	Obesity, Overweight	9.30779	0.159953	0	6013
278.1	Obesity	10.2542	0.165369	0	5835
278.11	Morbid Obesity	14.5175	0.22744	0	5165
250	Diabetes Mellitus	6.07313	0.300031	5.72528e-88	5577
250.2	Type 2 Diabetes	6.11266	0.303224	2.76703e-87	5566
401	Hypertension	4.04906	0.212409	1.00168e-78	6066
327.3	Sleep Apnea	5.55904	0.293344	1.14171e-77	5591
401.1	Essential Hypertension	4.0311	0.213552	2.87799e-77	6046
327.32	Obstructive Sleep Apnea	6.22494	0.356605	2.00636e-66	5402
250.4	Abnormal glucose	3.93191	0.254037	5.58593e-53	5792
512	Other symptoms of respiratory system	2.98984	0.204352	1.54338e-47	5223
495	Asthma	3.13032	0.250639	2.68613e-35	5274
272.1	Hyperlipidemia	2.48379	0.204533	1.56226e-33	5864
272	Disorders of lipoid metabolism	2.48151	0.204446	1.67811e-33	5866
250.41	Impaired fasting glucose	3.96996	0.330416	7.6547e-33	5471
278.4	Abnormal weight gain	5.08742	0.453244	7.10222e-29	4768
512.9	Other dyspnea	4.01151	0.364943	9.92002e-28	4203
250.42	Other abnormal glucose	3.62159	0.336161	8.54124e-27	5459
782.3	Edema	4.90766	0.464797	7.60937e-26	6294
530.11	GERD	2.64695	0.262656	1.10143e-23	5624
530.1	Esophagitis	2.51626	0.2525	3.34441e-23	5692
539	Bariatric surgery	6.59514	0.686601	1.05138e-21	6588
530	Diseases of esophagus	2.35125	0.247676	3.20644e-21	5729
256.4	Polycystic ovaries	7.68488	0.819517	9.34685e-21	6065
256	Ovarian dysfunction	6.96122	0.760841	7.67421e-20	6075
571	Chronic liver disease and cirrhosis	5.57544	0.630732	1.25053e-18	5880
512.7	Shortness of breath	3.29442	0.374926	2.20666e-18	4190
571.5	Other chronic nonalcoholic liver disease	5.76663	0.660338	3.1957e-18	5871
296	Mood disorders	2.14048	0.251564	2.28969e-17	5066
250.3	Insulin pump user	5.39036	0.637167	3.44052e-17	5195
743	Osteoporosis, osteopenia and pathological fracture	-2.70749	0.328742	2.14404e-16	6361
261	Vitamin deficiency	1.74434	0.214223	4.69108e-16	5832
261.4	Vitamin D deficiency	1.78665	0.219482	4.79204e-16	5761
296.2	Depression	2.16544	0.267257	6.71996e-16	4976
745	Pain in joint	1.52772	0.193481	3.4127e-15	5868
465	Acute upper respiratory infections	1.51418	0.200151	4.56535e-14	5117
743.9	Osteopenia or other disorder of bone and cartilage	-2.92907	0.394763	1.33016e-13	6200
681	Superficial cellulitis and abscess	2.82608	0.381189	1.3933e-13	6121
512.8	Cough	2.28084	0.308517	1.71575e-13	4325
497	Bronchitis	4.06375	0.553893	2.56814e-13	4669
495.2	Asthma with exacerbation	4.22118	0.577457	3.12952e-13	4659
300	Anxiety, phobic and dissociative disorders	1.58279	0.228879	5.21847e-12	5294
250.6	Polyneuropathy in diabetes	7.70335	1.11556	5.61512e-12	5135
272.12	Hyperglyceridemia	4.19191	0.614445	1.0358e-11	3871
250.24	Type 2 Diabetes (neurological)	7.01987	1.02995	1.04562e-11	5140
743.1	Osteoporosis	-3.53769	0.524695	1.70247e-11	6065
464	Acute sinusitis	2.10171	0.311956	1.83887e-11	4112
512.1	Wheezing	7.65213	1.1516	3.45461e-11	3927
740	Osteoarthrosis	1.97105	0.297671	3.85563e-11	6144
960	Poisoning by antibiotics	3.21403	0.486524	4.31173e-11	5587
244.4	Hypothyroidism NOS	1.61409	0.247169	7.11915e-11	5834
244	Hypothyroidism	1.44789	0.235554	8.42451e-10	5934
509	Respiratory failure, insufficiency, arrest	4.04925	0.679158	2.62319e-09	6336
681.5	Cellulitis and abscess of leg, except foot	5.58199	0.940446	3.09749e-09	5876
743.11	Osteoporosis NOS	-3.61504	0.610917	3.45093e-09	6020
112	Candidiasis	3.57332	0.605177	3.72332e-09	6180
246	Other disorders of thyroid	2.32711	0.396462	4.63255e-09	5280
182	Malignant neoplasm of uterus	9.48232	1.64389	8.39972e-09	6164
740.1	Osteoarthritis; localized	2.08207	0.362806	1.00073e-08	5925
703.1	Ingrowing nail	10.8227	1.9141	1.63485e-08	6273
401.3	Other hypertensive complications	5.48995	0.983194	2.48541e-08	4716
300.1	Anxiety disorder	1.36825	0.250023	4.64989e-08	5092
NA	NA	1.17975	0.217233	5.82064e-08	6288
550.6	Incisional hernia	8.15885	1.54091	1.23321e-07	6083
479	Other upper respiratory disease	2.90538	0.551628	1.45575e-07	4263
626.1	Irregular menstrual cycle/bleeding	1.87706	0.357897	1.62522e-07	5388
513.3	Hypoventilation	19.1812	3.66425	1.70403e-07	6557
456	Chronic venous insufficiency [CVI]	7.46314	1.43081	1.89302e-07	5668
621	Endometrial hyperplasia	14.7987	2.84801	2.0963e-07	6514
452	Other venous embolism and thrombosis	2.78506	0.537125	2.23193e-07	5795
687.4	Disturbance of skin sensation	1.83221	0.355707	2.68498e-07	5390
288.1	Decreased white blood cell count	-2.75965	0.538764	3.11838e-07	5770
722	Intervertebral disc disorders	1.45863	0.28545	3.32514e-07	5857
274.1	Gout	2.91732	0.572267	3.53164e-07	6571
550.2	Diaphragmatic hernia	3.1276	0.617151	4.14125e-07	6175
626	Disorders of menstruation and other abnormal bleeding from female genital tract	1.66116	0.327811	4.16441e-07	5472
415	Pulmonary heart disease	3.339	0.659457	4.23806e-07	6327
274	Gout and other crystal arthropathies	2.83548	0.56183	4.61173e-07	6576
272.11	Hypercholesterolemia	1.61135	0.319404	4.72543e-07	4307
716	Other arthropathies	1.98426	0.394548	5.0804e-07	5550
585.1	Acute renal failure	3.40498	0.6799	5.65852e-07	5889
452.2	Deep vein thrombosis [DVT]	3.52267	0.707816	6.65281e-07	5731
949	Allergies, other	2.24908	0.452252	6.79671e-07	5328
876	Posttraumatic wound infection not elsewhere classified	4.58162	0.928635	8.29499e-07	5757
681.7	Cellulitis and abscess of trunk	4.36637	0.887933	9.00603e-07	5881
642	Hypertension complicating pregnancy, childbirth, and the puerperium	5.54991	1.1312	9.50756e-07	6611
338.2	Chronic pain	1.093	0.224456	1.14629e-06	6207
707.2	Chronic ulcer of leg or foot	7.09647	1.46494	1.3003e-06	6587
764	Sciatica	1.85841	0.390075	1.94078e-06	5939
770	Myalgia and myositis unspecified	2.14979	0.452056	2.02275e-06	6313
532	Dysphagia	2.62544	0.552008	2.02783e-06	5065
743.12	Senile osteoporosis	-6.46423	1.37253	2.53698e-06	5925
250.22	Type 2 diabetes with renal manifestations	4.66342	1.00317	3.42457e-06	5142
740.11	Osteoarthrosis, localized, primary	1.80975	0.393751	4.39337e-06	5863
381	Otitis media and Eustachian tube disorders	1.79768	0.391379	4.45637e-06	5883
475	Chronic sinusitis	1.54305	0.336181	4.55422e-06	4515
395.1	Nonrheumatic mitral valve disorders	-2.68557	0.588247	5.08549e-06	6015
476	Allergic rhinitis	1.25455	0.276404	5.79756e-06	4729
296.22	Major depressive disorder	2.0681	0.456771	6.11693e-06	4543
283.1	Autoimmune hemolytic anemias	28.0947	6.25219	7.143e-06	5668
483	Acute bronchitis and bronchiolitis	2.91185	0.6497	7.55003e-06	5515
716.9	Arthropathy NOS	1.83507	0.412673	8.88722e-06	5522
760	Back pain	0.935378	0.211761	1.01788e-05	5944
798	Malaise and fatigue	0.907468	0.205565	1.03017e-05	5993
41.1	Staphylococcus infections	4.57717	1.04449	1.19451e-05	6081
550	Abdominal hernia	1.72416	0.39358	1.2019e-05	6346
626.13	Irregular menstrual cycle	4.09895	0.937946	1.26647e-05	5078
110.2	Dermatomycoses	13.7743	3.15903	1.32034e-05	6071
939	Atopic/contact dermatitis due to other or unspecified	2.1003	0.481725	1.32551e-05	5301
351	Other peripheral nerve disorders	2.13529	0.491273	1.40578e-05	6206
454.11	Varicose veins of lower extremity, symptomtic	6.01012	1.39533	1.68035e-05	5669
277.7	Dysmetabolic syndrome X	8.4688	1.98707	2.05583e-05	6346
381.1	Otitis media	2.15166	0.504838	2.05759e-05	5770
562	Diverticulosis and diverticulitis	2.10639	0.495027	2.1234e-05	5637
272.13	Mixed hyperlipidemia	1.65197	0.390526	2.38709e-05	4075
585	Renal failure	1.80378	0.430731	2.85777e-05	6039
977	Personal history of allergy to medicinal agents	5.95047	1.42253	2.92182e-05	5434
496	Chronic airway obstruction	2.04295	0.494816	3.71121e-05	4712
733	Other disorders of bone and cartilage	-2.37583	0.575654	3.72563e-05	5609
649	Other conditions or status of the mother complicating pregnancy, childbirth, or the puerperium	3.97446	0.966899	3.99597e-05	6541
495.1	Chronic obstructive asthma	7.14277	1.7448	4.31829e-05	4558
416	Cardiomegaly	3.63305	0.888321	4.37146e-05	6283
297	Suicidal ideation or attempt	4.88347	1.19547	4.48707e-05	4380
726	Peripheral enthesopathies and allied syndromes	1.35355	0.33265	4.78631e-05	5666
244.2	Acquired hypothyroidism	1.7444	0.429189	4.88602e-05	5235
327.1	Hypersomnia	6.08919	1.5113	5.68052e-05	5088
327	Sleep disorders	1.08117	0.269338	6.04174e-05	5674
574.1	Cholelithiasis	2.4921	0.624657	6.6942e-05	6356
306.1	Mental disorders durring/after pregnancy	9.16344	2.30544	7.16058e-05	4361
110	Dermatophytosis / Dermatomycosis	2.9379	0.741038	7.43613e-05	6141
382	Otalgia	2.85116	0.720651	7.7026e-05	5687
798.1	Chronic fatigue syndrome	5.31035	1.34535	8.02146e-05	4784
340	Migraine	1.18277	0.300389	8.32545e-05	6213
574	Cholelithiasis and cholecystitis	2.12321	0.540573	8.6667e-05	6392
292.6	Hallucinations	11.1383	2.8459	9.1822e-05	6246
112.3	Candidiasis of skin and nails	8.24459	2.10885	9.3489e-05	6076
722.6	Degeneration of intervertebral disc	1.38332	0.354836	9.79235e-05	5636
418	Nonspecific chest pain	0.948755	0.244328	0.000104211	6123
276	Disorders of fluid, electrolyte, and acid-base balance	1.15146	0.300325	0.000127282	6255
300.9	Posttraumatic stress disorder	3.71668	0.975316	0.000140448	4393
427	Cardiac dysrhythmias	0.953233	0.25162	0.000153125	5964
274.11	Gouty arthropathy	3.09084	0.821888	0.000170953	6503
280	Iron deficiency anemias	2.03634	0.541867	0.000172946	5805
276.1	Electrolyte imbalance	1.20305	0.320219	0.000173561	6192
498	Acute bronchospasm	3.85379	1.02582	0.000174239	4581
771.1	Swelling of limb	3.23493	0.869478	0.000200526	6286
443.1	Raynaud's syndrome	-4.08822	1.09952	0.000202438	6145
41.12	Methicillin resistant Staphylococcus aureus	5.02244	1.35077	0.000202453	6066
271.3	Intestinal disaccharidase deficiencies and disaccharide malabsorption	9.68666	2.60565	0.000202818	6602
509.8	Dependence on respirator [Ventilator] or supplemental oxygen	4.22207	1.13616	0.000204105	6278
257	Testicular dysfunction	2.58411	0.696553	0.000209231	6089
720	Spinal stenosis	1.60368	0.434532	0.000225898	5514
840.1	Muscle/tendon sprain	6.58544	1.7847	0.00022663	5136
740.9	Osteoarthrosis NOS	1.71075	0.464578	0.000233179	5780
358	Myoneural disorders	10.4436	2.83831	0.000235578	6449
286.2	Encounter for long-term (current) use of anticoagulants	2.0414	0.555719	0.000241354	6116
772.3	Muscle weakness	5.18885	1.41647	0.000251146	6206
721	Spondylosis and allied disorders	1.32897	0.363144	0.00025491	5619
841	Sprains and strains of back and neck	1.41851	0.389391	0.00027211	5411
288.11	Neutropenia	-2.9584	0.813694	0.000279608	5691
523	Gingival and periodontal diseases	7.62957	2.10576	0.00029335	6133
280.1	Iron deficiency anemias, unspecified or not due to blood loss	2.14311	0.594534	0.000315169	5781
763	Thoracic or lumbosacral neuritis or radiculitis, unspecified	1.49697	0.415803	0.000320581	5900
110.1	Dermatophytosis	2.75766	0.771764	0.00035536	6135
261.2	Vitamin B-complex deficiencies	2.1767	0.610317	0.000365338	4742
938	Dermatitis due to solar radiation	10.0754	2.82758	0.000369628	5125
765	Cervical radiculitis	2.19759	0.617653	0.000376742	5764
38	Septicemia	3.00222	0.844478	0.00038067	6101
594	Urinary calculus	1.44958	0.408228	0.000386625	6455
465.2	Acute pharyngitis	0.99182	0.27967	0.000394762	4254
41	Bacterial infection NOS	1.36636	0.385767	0.00040007	6331
285	Other anemias	1.25754	0.355635	0.000409232	6010
722.1	Displacement of intervertebral disc	1.63602	0.463585	0.000420477	5480
523.3	Periodontitis (acute or chronic)	8.40475	2.38645	0.000431639	6131
523.31	Acute periodontitis	8.40475	2.38645	0.000431639	6131
41.4	E. coli	4.45086	1.26781	0.000450209	6069
840	Sprains and strains	1.06555	0.304856	0.000477308	5604
338.1	Acute pain	2.11184	0.608641	0.000525048	5344
789	Nausea and vomiting	1.03333	0.298266	0.000534949	6077
276.6	Fluid overload	6.80949	1.98009	0.000588031	5771
707	Chronic ulcer of skin	3.8898	1.13153	0.000590444	6600
257.1	Testicular hypofunction	2.45185	0.713284	0.000591247	6085
961.1	Poisoning/allergy of sulfonamides	3.22541	0.94011	0.000606064	5459
245	Thyroiditis	1.88855	0.559194	0.000737523	5138
427.41	Ventricular fibrillation and flutter	12.1824	3.62021	0.000770695	5195
938.1	Acute dermatitis due to solar radiation	10.548	3.16111	0.000853552	5124
622.1	Polyp of corpus uteri	6.7153	2.01334	0.000856519	6519
626.11	Absent or infrequent menstruation	3.08721	0.929406	0.000901038	5079
443	Peripheral vascular disease	-2.50803	0.755471	0.000905953	6184
761	Cervicalgia	1.08743	0.327906	0.000917472	6167
573.9	Abnormal serum enzyme levels	1.99131	0.601616	0.000938796	5889
714	Rheumatoid arthritis and other inflammatory polyarthropathies	2.32245	0.703877	0.000974929	5306
38.2	Gram positive septicemia	14.6397	4.45289	0.00101594	6046
297.1	Suicidal ideation	5.32892	1.62434	0.00104372	4368
414.2	ASCVD	14.6101	4.50846	0.00119921	6072
994	Sepsis and SIRS	2.45879	0.761663	0.00125189	6588
994.2	Sepsis	2.60837	0.808496	0.00126057	6580
427.4	Cardiac arrest and ventricular fibrillation	6.10967	1.89488	0.00127063	5203
381.11	Suppurative and unspecified otitis media	1.99645	0.621418	0.00132212	5714
41.11	Methicillin sensitive Staphylococcus aureus	10.0806	3.15035	0.00138218	6048
580.31	Nephritis and nephropathy in diseases classified elsewhere	6.12632	1.92705	0.00148495	5808
495.11	Chronic obstructive asthma with exacerbation	6.39334	2.01188	0.00149392	4555
649.1	Diabetes or abnormal glucose tolerance complicating pregnancy	5.80313	1.83747	0.00159458	6509
355	Complex regional/central pain syndrome	6.58748	2.09443	0.00166762	6045
245.21	Chronic lymphocytic thyroiditis	1.87457	0.597202	0.0017054	5122
180.1	Cervical cancer	6.63062	2.12039	0.00177396	6055
480	Pneumonia	1.43812	0.46262	0.00188895	5615
562.1	Diverticulosis	2.01196	0.651801	0.00203346	5561
245.2	Chronic thyroiditis	1.83067	0.594665	0.00209153	5123
496.21	Obstructive chronic bronchitis	3.31481	1.07878	0.0021336	4578
512.2	Painful respiration	1.97004	0.641902	0.00216176	3985
276.13	Hyperpotassemia	4.66966	1.52277	0.00217549	5778
599.4	Urinary incontinence	1.95991	0.640752	0.00223366	5290
457.2	Encounter for long-term (current) use of antiplatelets/antithrombotics	11.2075	3.66734	0.00225344	5651
509.1	Respiratory failure	2.7298	0.897089	0.00235232	6297
960.2	Allergy/adverse effect of penicillin	2.37508	0.780539	0.00235443	5479
721.1	Spondylosis without myelopathy	1.15679	0.38297	0.00253439	5582
306	Other mental disorder	5.06817	1.68108	0.00258606	4367
580	Nephritis; nephrosis; renal sclerosis	4.67613	1.55144	0.00258895	5814
288.2	Elevated white blood cell count	1.54037	0.512787	0.00267663	5788
458.2	Iatrogenic hypotension	13.3951	4.47498	0.00277017	6292
454.1	Varicose veins of lower extremity	3.13216	1.05471	0.00299361	5685
975	Poisoning by agents primarily acting on the smooth and skeletal muscles and respiratory system	12.9381	4.3668	0.00306149	5417
411.3	Angina pectoris	3.16077	1.07042	0.00316082	6106
277	Other disorders of metabolism	3.7098	1.25662	0.00316666	6361
714.1	Rheumatoid arthritis	2.15485	0.730336	0.00318657	5300
288	Diseases of white blood cells	1.47142	0.499281	0.00322075	5797
741.3	Difficulty in walking	10.7456	3.64849	0.00323956	6021
327.7	Sleep related movement disorders	2.36358	0.804233	0.00330819	5130
512.3	Abnormal chest sounds	6.01998	2.05631	0.00343599	3909
611	Abnormal findings on mammogram or breast exam	-0.795395	0.273194	0.00361085	5912
258.1	Postablative ovarian failure	6.43148	2.22729	0.00389598	6012
965	Poisoning by analgesics, antipyretics, and antirheumatics	4.76823	1.65576	0.0039951	5429
737	Curvature of spine	-1.92906	0.672676	0.00414839	6063
283	Acquired hemolytic anemias	12.6525	4.42611	0.00427065	5669
527	Diseases of the salivary glands	4.27854	1.50362	0.00444842	6404
642.1	Preeclampsia and eclampsia	6.018	2.12411	0.00462269	6588
626.15	Infertility, female, associated with anovulation	7.85764	2.78154	0.00474783	5038
304	Adjustment reaction	1.94098	0.690194	0.00494164	4433
276.14	Hypopotassemia	1.08344	0.385336	0.00494429	6045
802	Fracture of pelvis	-6.80647	2.42099	0.00494817	5937
327.71	Restless legs syndrome	2.38112	0.84793	0.00500147	5124
454	Varicose veins	2.7757	0.990357	0.00508441	5690
974	Poisoning by water, mineral, and uric acid metabolism drugs	8.6497	3.09397	0.00519754	5419
696	Psoriasis and related disorders	2.83194	1.01516	0.00529284	6092
696.4	Psoriasis	2.83194	1.01516	0.00529284	6092
574.12	Cholelithiasis with other cholecystitis	7.88212	2.82598	0.00530042	6256
741.4	Joint effusions	1.91392	0.687951	0.00541813	6104
180	Cervical cancer and dysplasia	3.86418	1.39032	0.00546366	6067
260.6	Anorexia	-4.97592	1.80047	0.00573799	4645
580.3	Nephritis and nephropathy without mention of glomerulonephritis	4.70865	1.70899	0.00588355	5811
586	Other disorders of the kidney and ureters	1.3192	0.479118	0.00591595	5988
695.2	Bullous dermatoses	17.4312	6.33689	0.00596332	6161
695.22	Pemphigus and pemphigoid	17.4312	6.33689	0.00596332	6161
625	Pain and other symptoms associated with female genital organs	-1.20889	0.452412	0.00755798	6129
574.2	Calculus of bile duct	4.35413	1.63329	0.00769861	6266
626.12	Excessive or frequent menstruation	1.64587	0.620701	0.00803492	5139
275.5	Disorders of calcium/phosphorus metabolism	2.35275	0.899888	0.00895698	6383
721.2	Spondylosis with myelopathy	5.49202	2.11168	0.00932704	5293
249	Secondary diabetes mellitus	4.17685	1.63207	0.0105188	5120
348	Other conditions of brain	2.58931	1.01268	0.0105858	6043
720.1	Spinal stenosis of lumbar region	1.33969	0.523952	0.010588	5439
514.2	Solitary pulmonary nodule	-1.76304	0.690492	0.0106934	6395
800.1	Fracture of neck of femur	-3.97924	1.55918	0.0107313	5947
427.42	Cardiac arrest	5.64335	2.2213	0.0110964	5200
870.3	Other open wound of head and face	-2.35814	0.928617	0.0111301	5756
519	Other diseases of respiratory system, not elsewhere classified	1.92806	0.759922	0.0111988	6256
742.1	Loose body in joint	11.3316	4.46788	0.0112299	6020
496.2	Chronic bronchitis	2.23881	0.883474	0.0113067	4594
555	Inflammatory bowel disease and other gastroenteritis and colitis	-2.02506	0.801358	0.0115306	5526
562.2	Diverticulitis	1.8036	0.71482	0.0116584	5544
704.2	Hirsutism	4.61271	1.83183	0.0118242	6274
785	Abdominal pain	0.512945	0.203923	0.0119163	5979
428	Congestive heart failure; nonhypertensive	1.97331	0.785764	0.0120519	6459
250.14	Type 1 diabetes with neurological manifestations	7.35073	2.93731	0.0123617	5111
729.3	Panniculitis	11.2165	4.49407	0.0125963	5267
622	Polyp of female genital organs	4.2488	1.70261	0.0126036	6523
110.11	Dermatophytosis of nail	2.56421	1.02966	0.0127878	6105
513	Respiratory abnormalities	3.93861	1.59277	0.0134307	6570
654.1	Abnormality of organs and soft tissues of pelvis complicating pregnancy, childbirth, or the puerperium	7.89506	3.19423	0.0134738	6572
705.3	Hidradenitis	9.11759	3.69858	0.0137222	6181
783	Fever of unknown origin	1.34494	0.54569	0.0137411	6229
743.21	Pathologic fracture of vertebrae	-4.35607	1.78027	0.0144396	5916
172.2	Other non-epithelial cancer of skin	-1.5942	0.659297	0.0156329	6317
737.3	Kyphoscoliosis and scoliosis	-1.82035	0.753052	0.0156657	6044
340.1	Migrain with aura	1.81999	0.756305	0.0161406	5787
474.1	Acute tonsillitis	2.28135	0.950558	0.0164379	4171
70.9	Hepatitis NOS	-5.75986	2.41146	0.0169503	5345
277.51	Lipoprotein disorders	2.88546	1.21139	0.0172505	6363
411.2	Myocardial infarction	1.46219	0.614738	0.017411	6183
300.4	Dysthymic disorder	2.88914	1.21622	0.0175679	4379
519.8	Other diseases of respiratory system, NEC	2.3082	0.972666	0.0176713	6228
275.53	Disorders of phosphorus metabolism	3.56999	1.50579	0.0177774	6350
70.3	Viral hepatitis C	-2.91517	1.23039	0.0178567	5365
789.1	Persistent vomiting	4.93528	2.08315	0.017863	5591
415.1	Acute pulmonary heart disease	2.31333	0.977088	0.0179354	6274
415.11	Pulmonary embolism and infarction, acute	2.31333	0.977088	0.0179354	6274
528.7	Sialolithiasis	15.0133	6.35637	0.0182096	6387
252.2	Hypoparathyroidism	8.53924	3.63249	0.0187654	6007
355.1	Chronic pain syndrome	2.42378	1.03723	0.0194826	6073
695	Erythematous conditions	1.91139	0.819046	0.0196445	6221
This is a table of the 301 phenotype groups (phecodes) reaching statistical significance (p<1.96x10-2) when associated to BMI in our cohort including DM2-diagnosed individuals.
Phecodes and their description, effect sizes (β) of the regression, standard error (SE), and p-values are included. Each phecode group contains at least 20 cases.
